# Supplementary material for: Discovery of Novel Cyclic Ethers with Synergistic Antiplasmodial Activity in Combination with Valinomycin
Source: MDPI journal article supplement (doi:10.3390/molecules26247494), 2021-12-10
Supplement: s1 [file s1]

## Supplementary Materials:

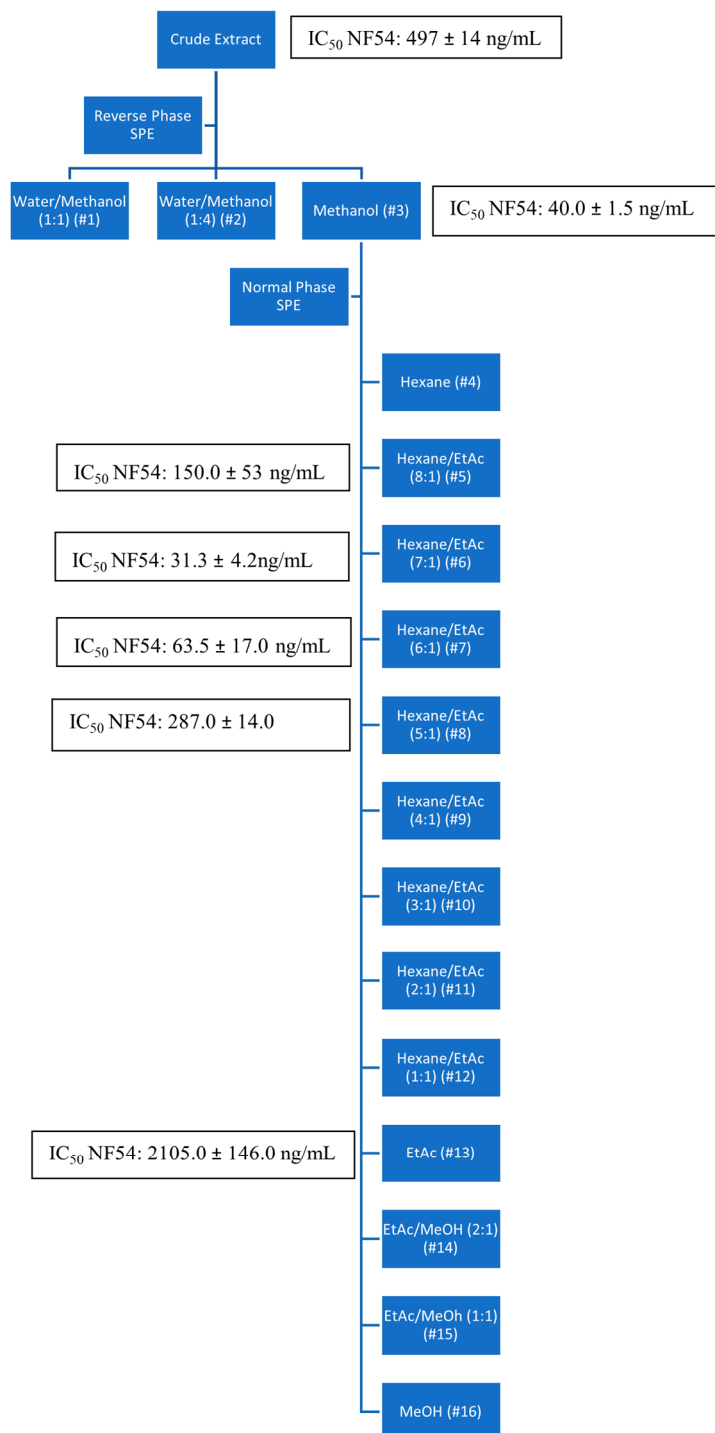

**Supplementary Figure S1.** Flow diagram of fractionation of *Streptomyces* strain PR3 crude extract by solid phase extraction. Each fraction is marked with its elution solvent and fraction number. Active fractions are shown with their corresponding mean antiplasmodial activity against *P. falciparum*, NF54.

**Supplementary Table S1.** Mass spectrometric data of the cyclodepsipeptides identified in fractions #5-#8.

| Experimental Mass (Da)   | <i>m/z</i> (M+NH <sub>4</sub> <sup>+</sup> ) | Retention Time (minutes) |
|--------------------------|----------------------------------------------|--------------------------|
| 740.4218 (Montanastatin) | 758.4552                                     | 10.21                    |
| 1054.5671                | 1072.5997                                    | 10.27                    |
| 1068.5820                | 1086.6151                                    | 10.33                    |
| 1082.5984                | 1100.6308                                    | 10.46                    |
| 1096.6130                | 1114.6461                                    | 10.56                    |
| 1110.6339 (Valinomycin)  | 1128.6616                                    | 10.72                    |
| 1124.6454                | 1142.6778                                    | 10.82                    |
| 1138.6759                | 1156.6997                                    | 10.95                    |

**Supplementary Table S2.** Mass spectrometric data of the cyclic propylene glycols discovered in fraction #13.

| Mass/Charge<br>[M+NH <sub>4</sub> <sup>+</sup> ]<br>( <i>m/z</i> ) | Experimental<br>Mass (Da) | Theoretical<br>Mass (Da) | Mass<br>Error<br>(ppm) | Chemical<br>Formula                              |
|--------------------------------------------------------------------|---------------------------|--------------------------|------------------------|--------------------------------------------------|
| 772.5780                                                           | 754.5437                  | 754.5442                 | -0.7                   | C <sub>39</sub> H <sub>78</sub> O <sub>13</sub>  |
| 830.6207                                                           | 812.5864                  | 812.5869                 | 0.5                    | C <sub>42</sub> H <sub>84</sub> O <sub>14</sub>  |
| 888.6597                                                           | 870.6271                  | 870.6274                 | -0.3                   | C <sub>45</sub> H <sub>90</sub> O <sub>15</sub>  |
| 946.7076                                                           | 928.6733                  | 928.6698                 | 3.8                    | C <sub>48</sub> H <sub>96</sub> O <sub>16</sub>  |
| 1004.7451                                                          | 986.7108                  | 986.7116                 | -0.8                   | C <sub>51</sub> H <sub>102</sub> O <sub>17</sub> |
| 1062.7879                                                          | 1044.7536                 | 1044.7537                | 0.1                    | C <sub>54</sub> H <sub>108</sub> O <sub>18</sub> |
| 1120.8329                                                          | 1102.7986                 | 1102.7955                | 2.9                    | C <sub>57</sub> H <sub>114</sub> O <sub>19</sub> |
| 1178.8710                                                          | 1160.8367                 | 1160.8371                | -0.4                   | C <sub>60</sub> H <sub>120</sub> O <sub>20</sub> |
| 1236.9079                                                          | 1218.8736                 | 1218.8791                | -4.5                   | C <sub>63</sub> H <sub>126</sub> O <sub>21</sub> |
| 1294.9436                                                          | 1276.9136                 | 1276.9209                | -5.7                   | C <sub>66</sub> H <sub>132</sub> O <sub>22</sub> |

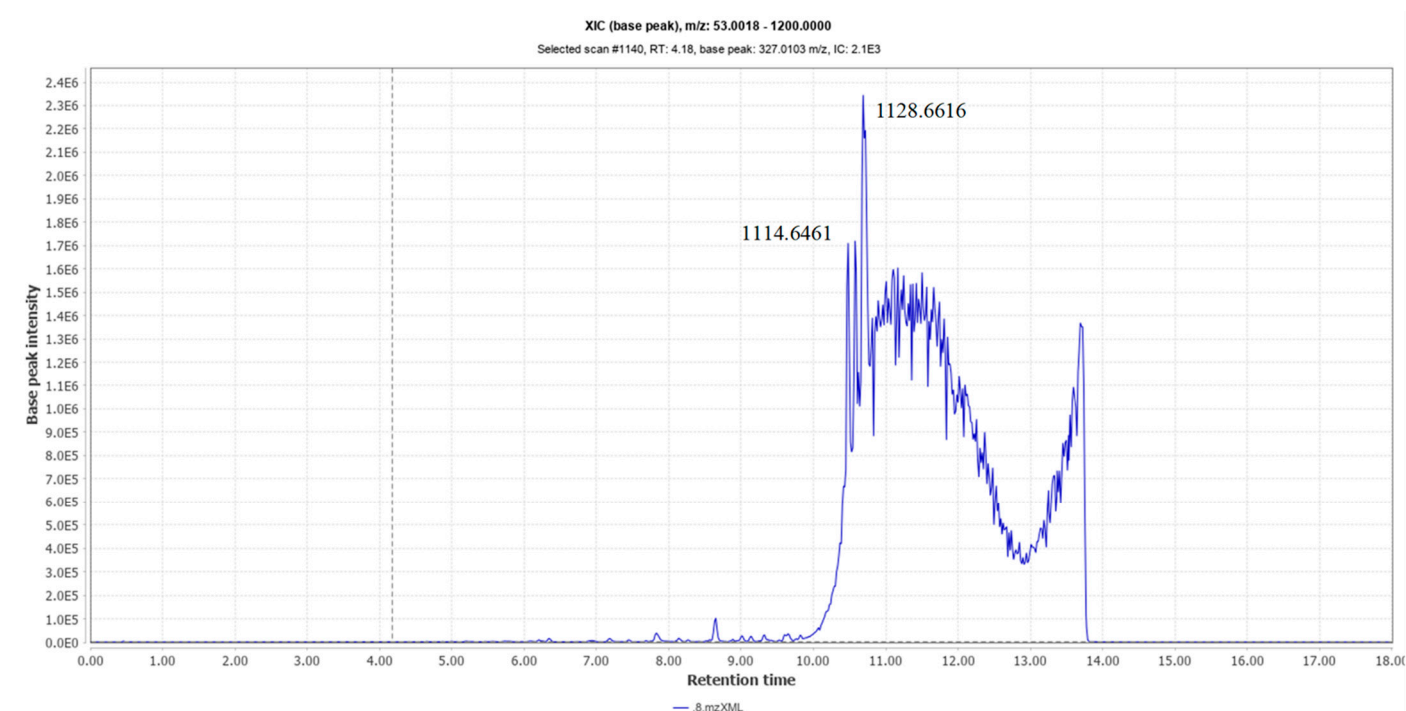

**Supplementary Figure S2.** Chromatogram of fraction #5 displaying the cyclodepsipeptides with the greatest intensity.

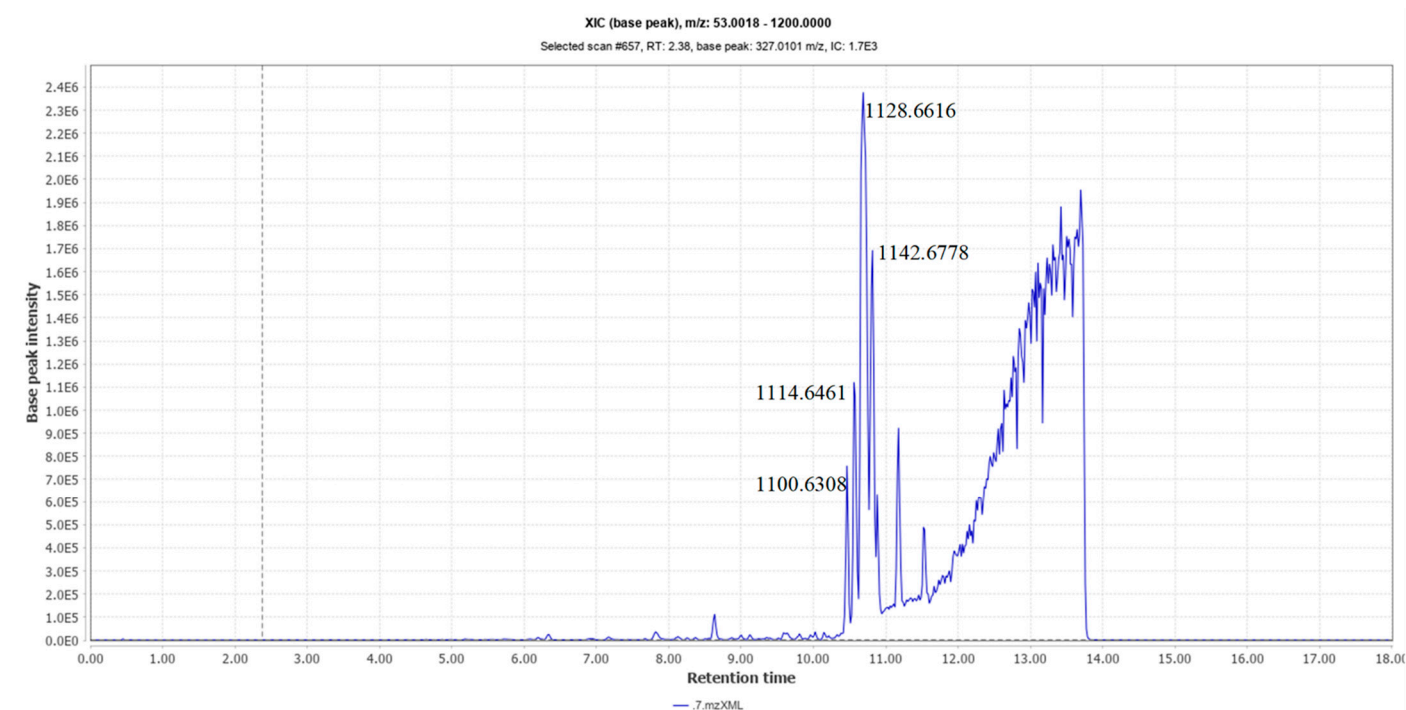

**Supplementary Figure S3.** Chromatogram of fraction #6 displaying the cyclodepsipeptides with the greatest intensity.

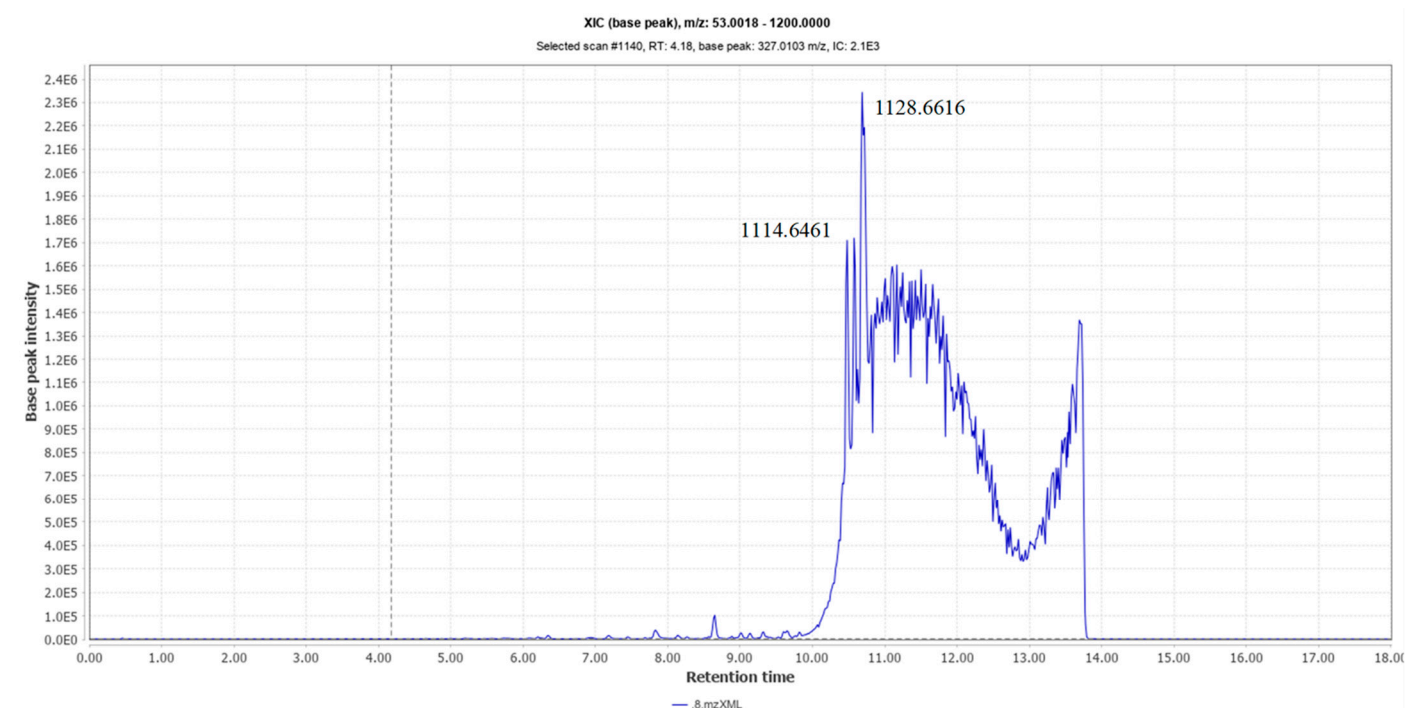

**Supplementary Figure S4.** Chromatogram of fraction #7 displaying the cyclodepsipeptides with the greatest intensity.

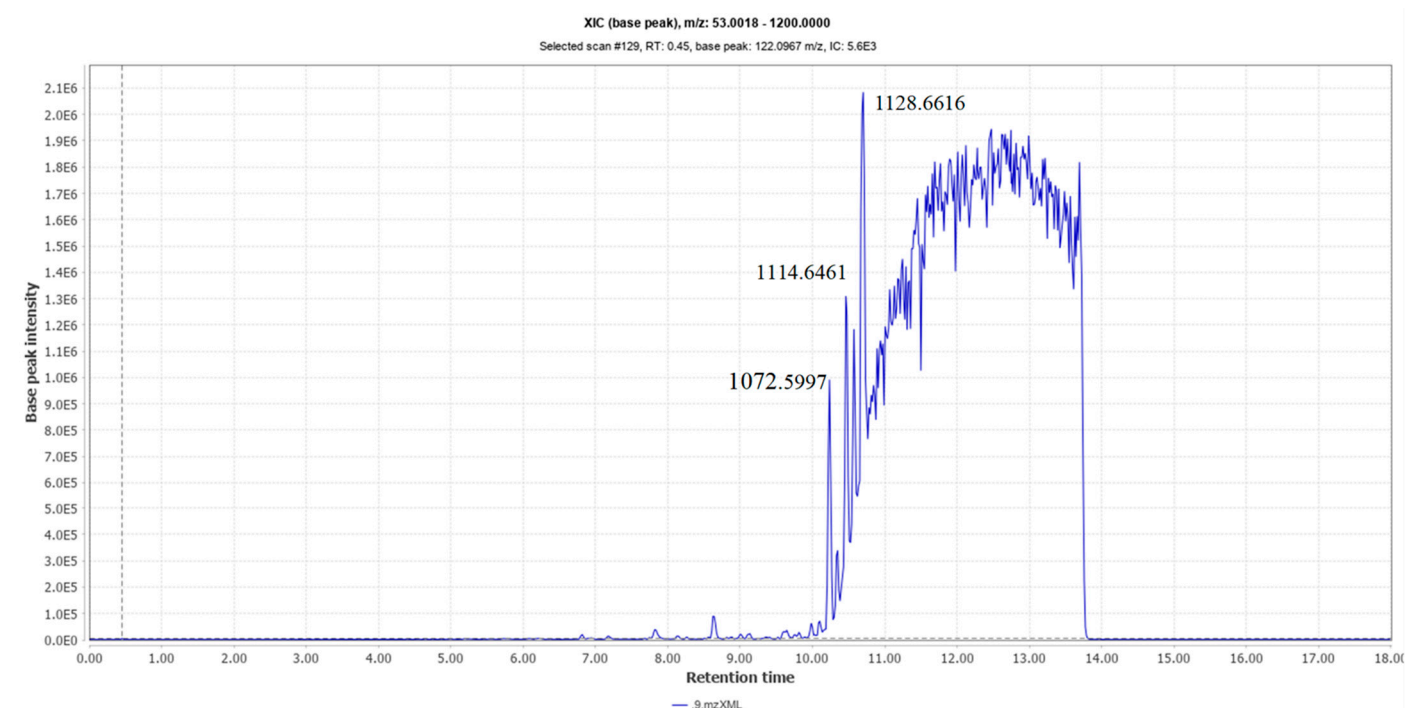

**Supplementary Figure S5.** Chromatogram of fraction #8 displaying the cyclodepsipeptides with the greatest intensity.

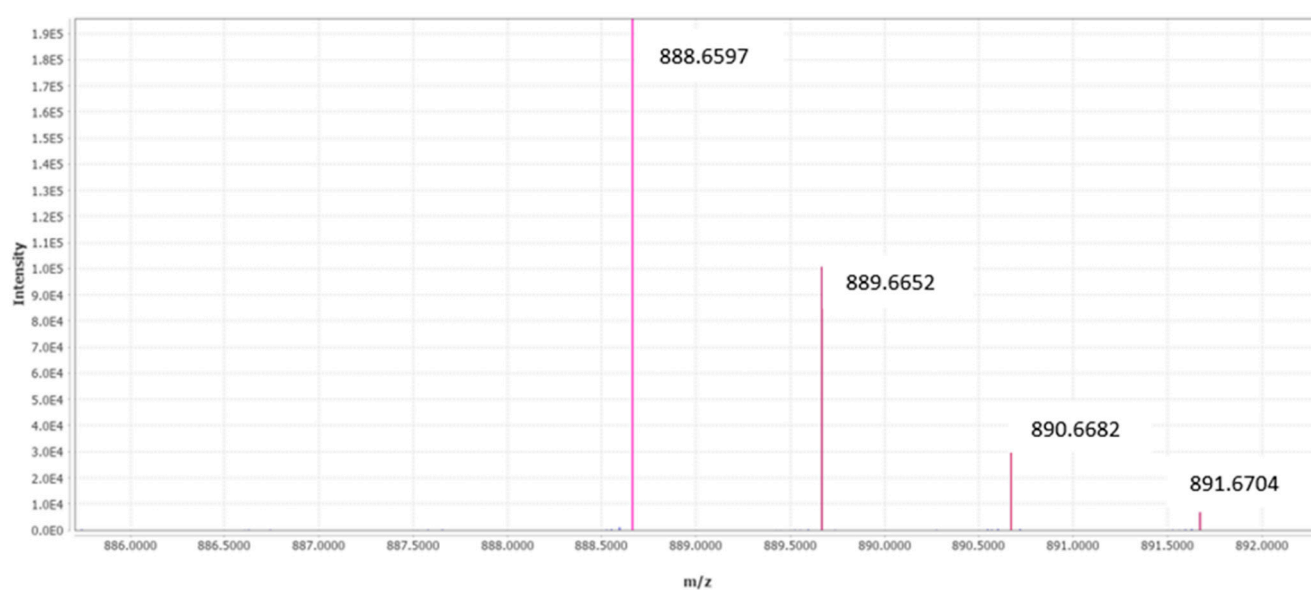

Supplementary Figure S6. Isotope pattern of compound 870  $[M+NH_4]^+$ .

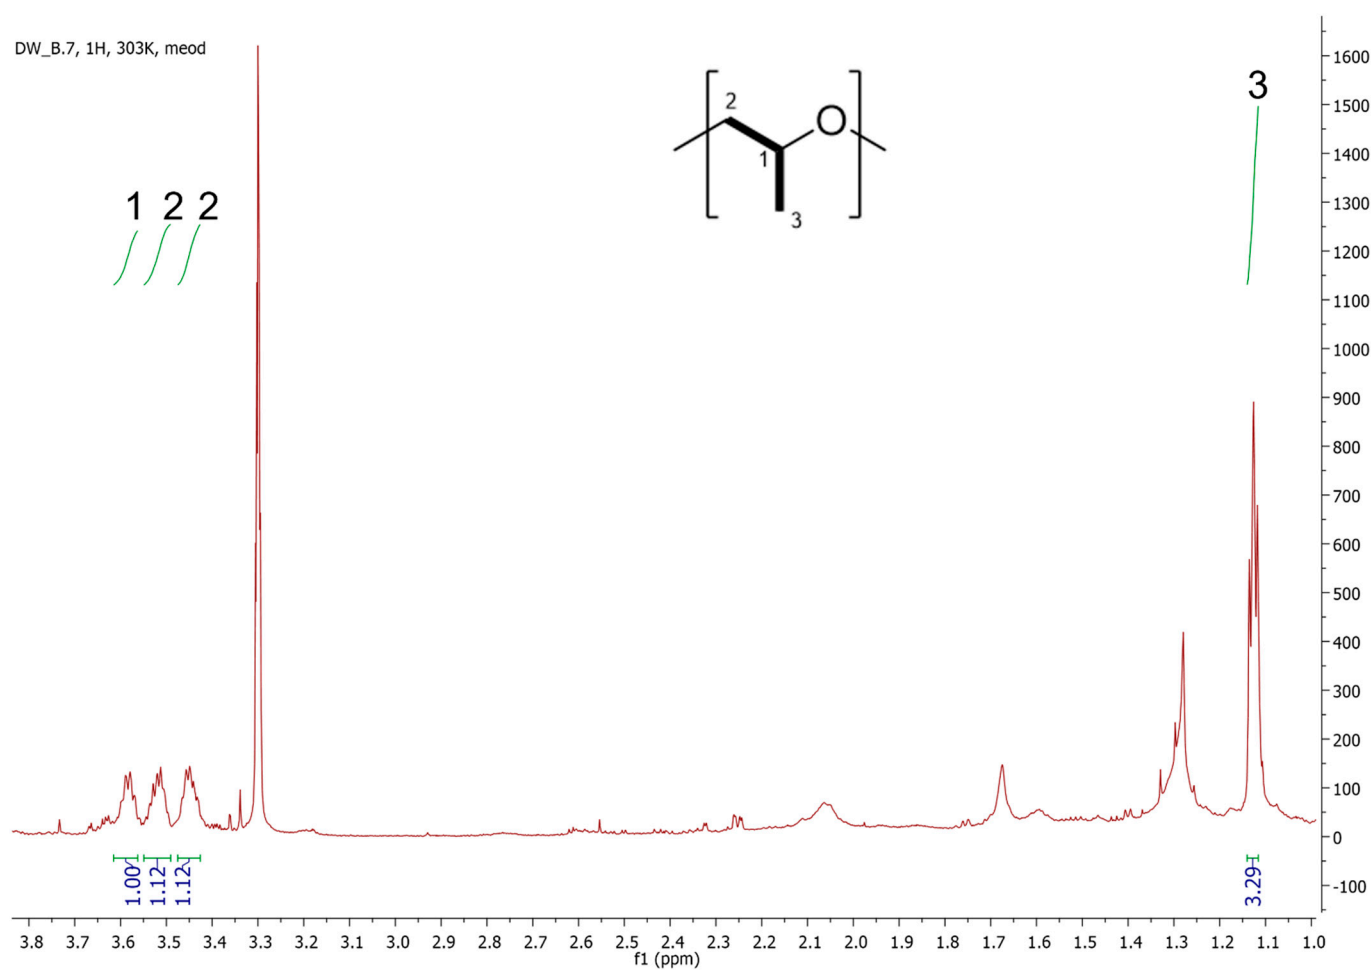

Supplementary Figure S7.  $^1H$  NMR spectrum of the cPPGs (fraction #13) with the annotated propylene glycol monomer.

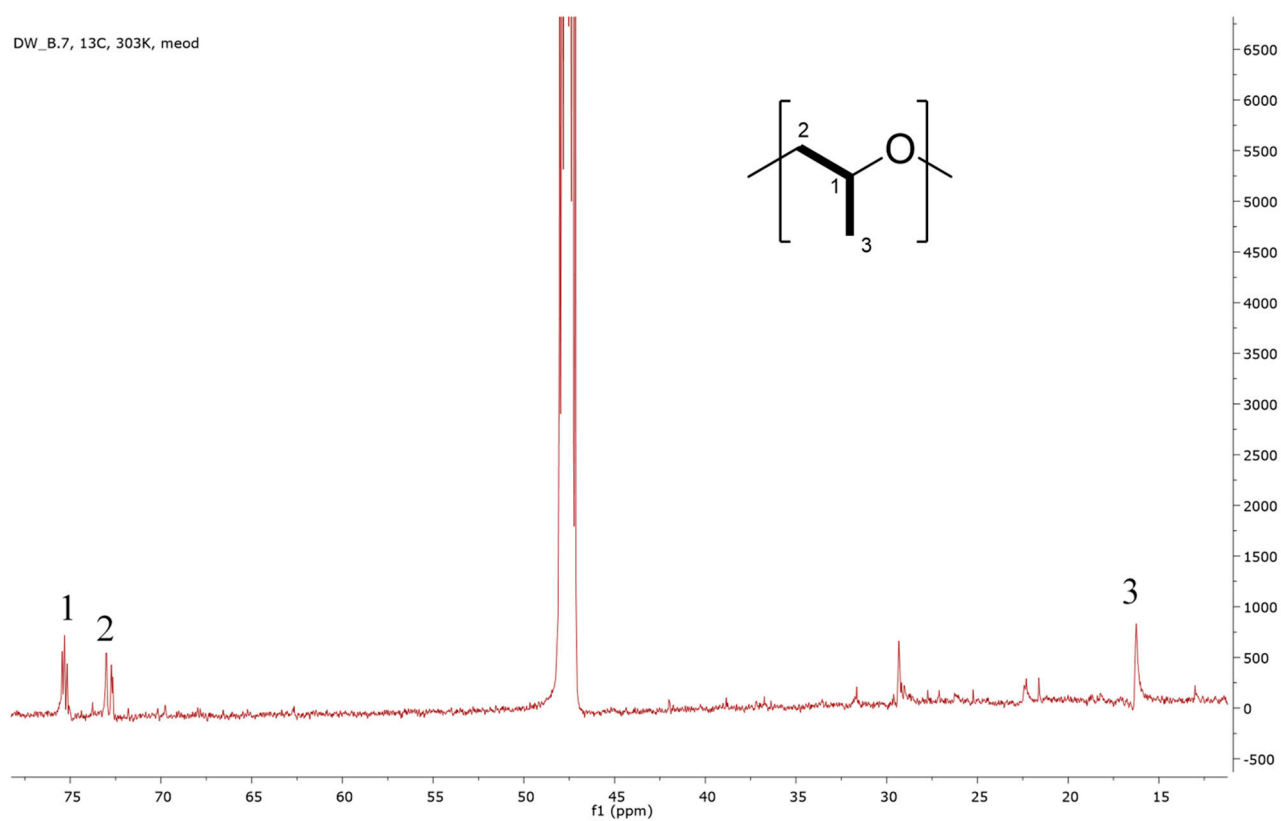

**Supplementary Figure S8.**  $^{13}\text{C}$  NMR spectrum of the cPPGs (fraction #13) with the annotated propylene glycol monomer.

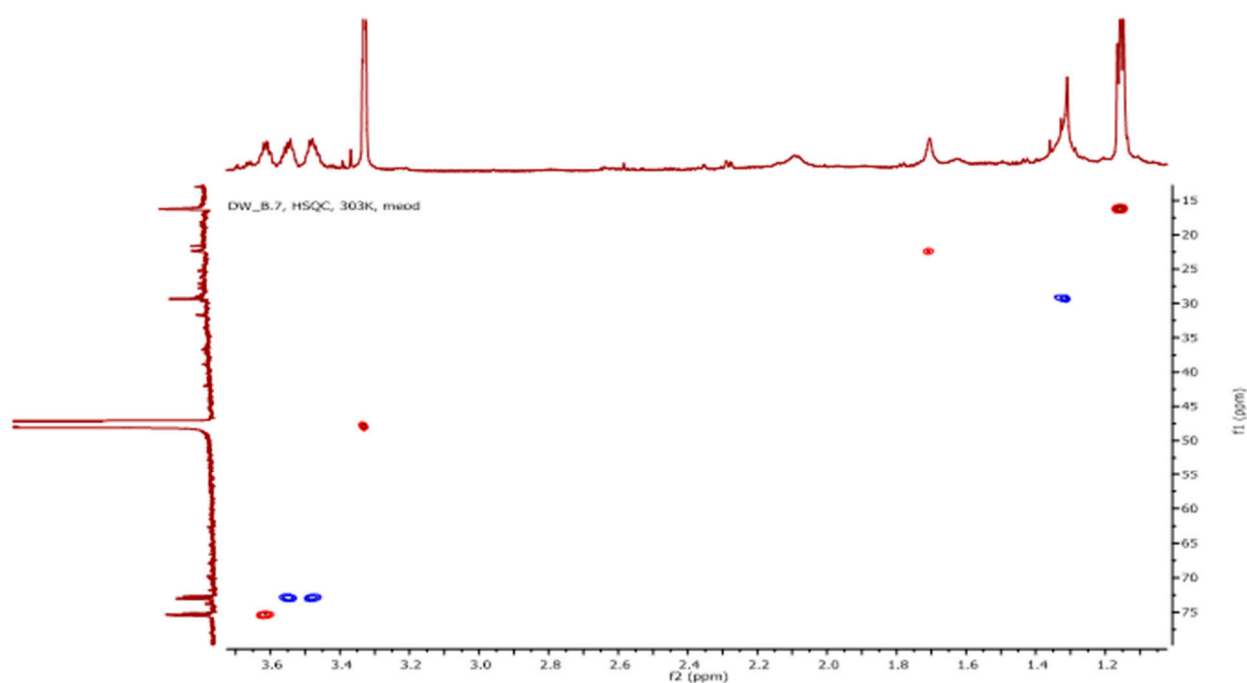

**Supplementary Figure S9.** HSQC spectrum of the cPPGs (fraction #13).

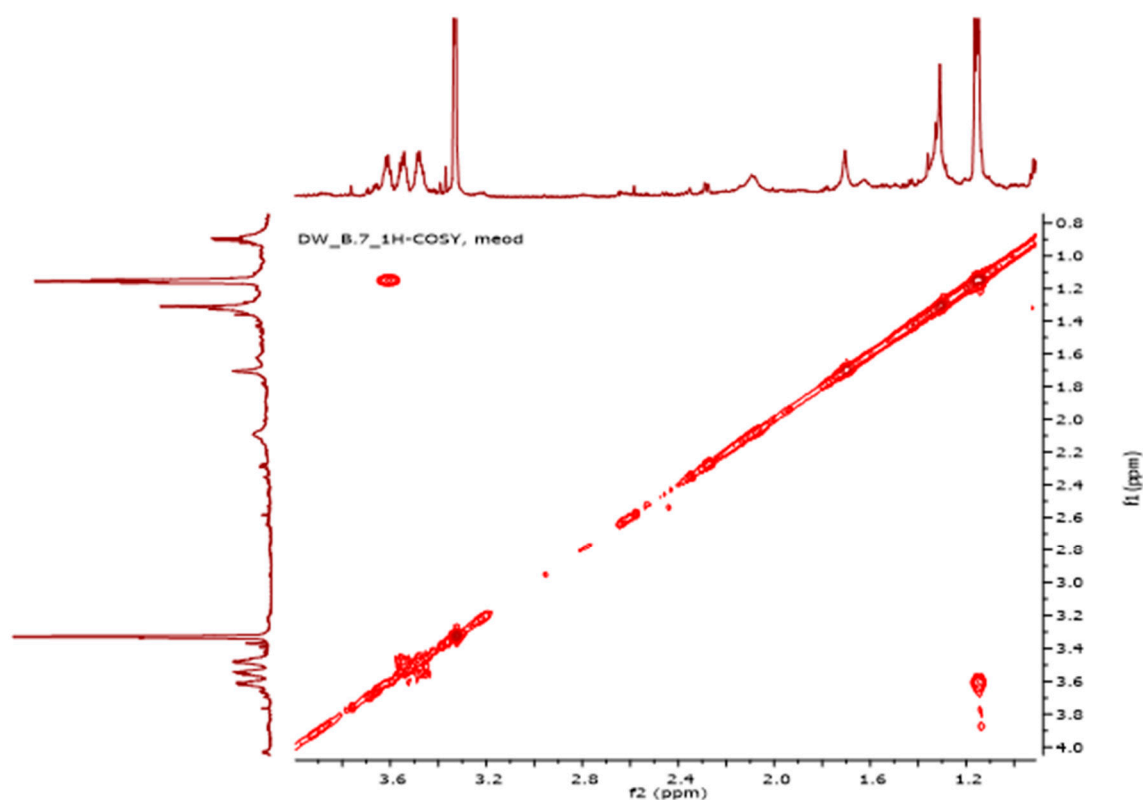

Supplementary Figure S10.  $^1\text{H}$ -COSY spectrum of the cPPGs (fraction #13).

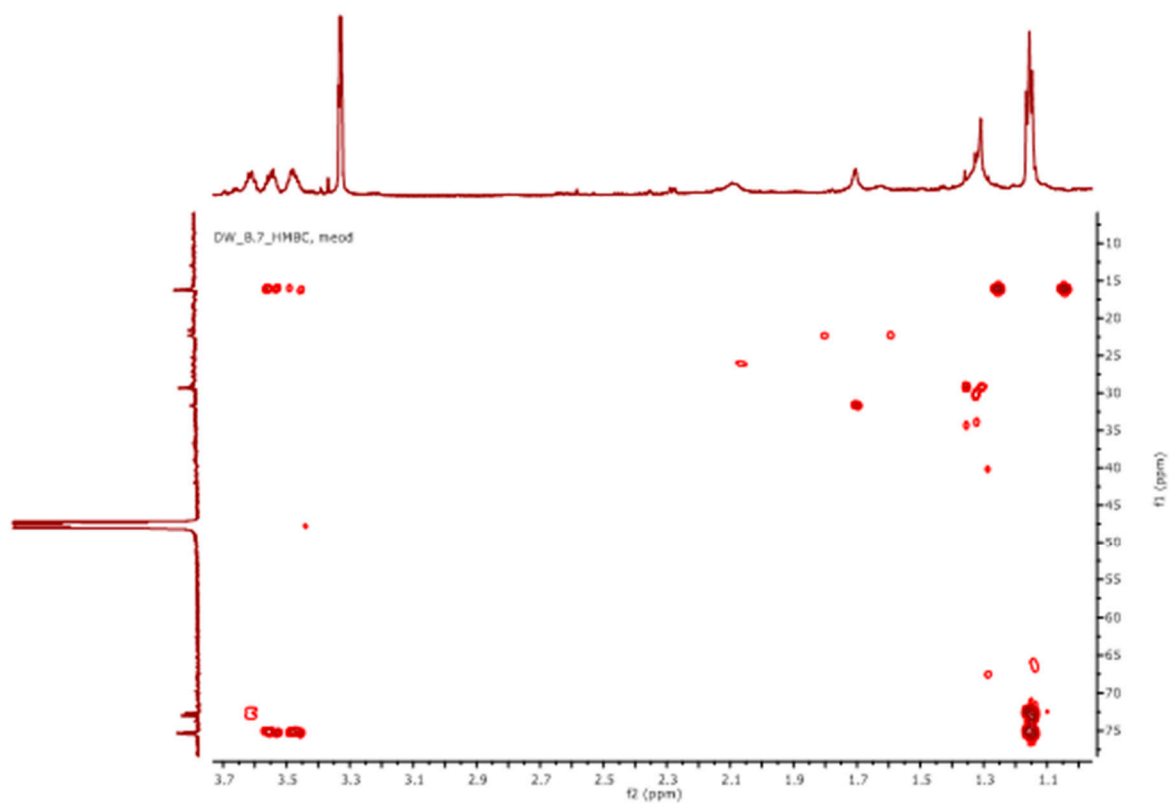

Supplementary Figure S11. HMBC spectrum of the cPPGs (fraction #13).

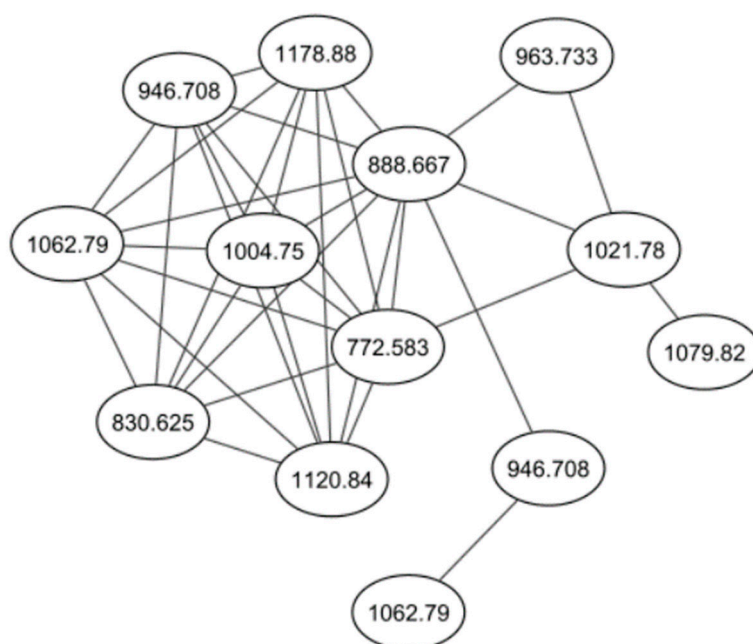

**Supplementary Figure S12.** Molecular network of the cPPGs found in the EtAc and water wash of the XAD-16N resin.

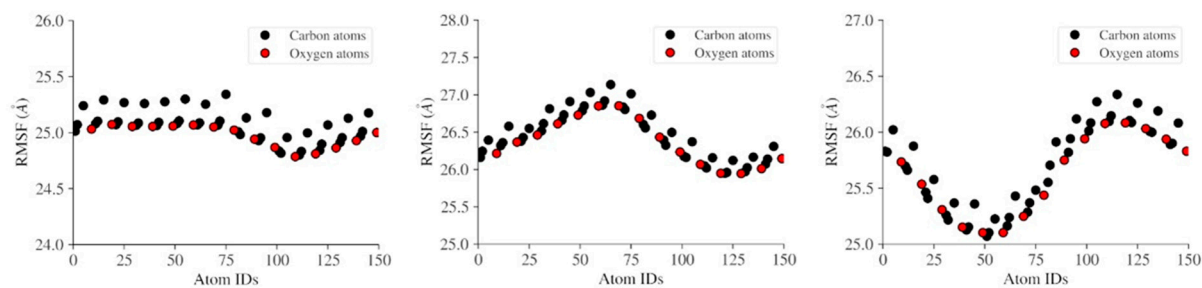

**Supplementary Figure S13.** RMSF's of the heavy atoms (Carbon and Oxygen) of compound 870 in varying systems (sodium, potassium and ammonium chloride solutions).



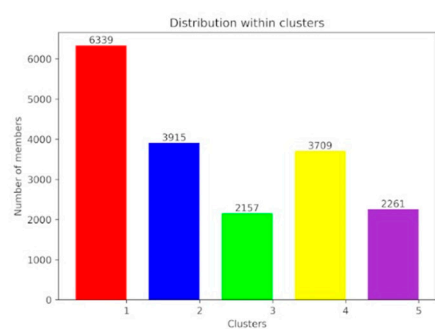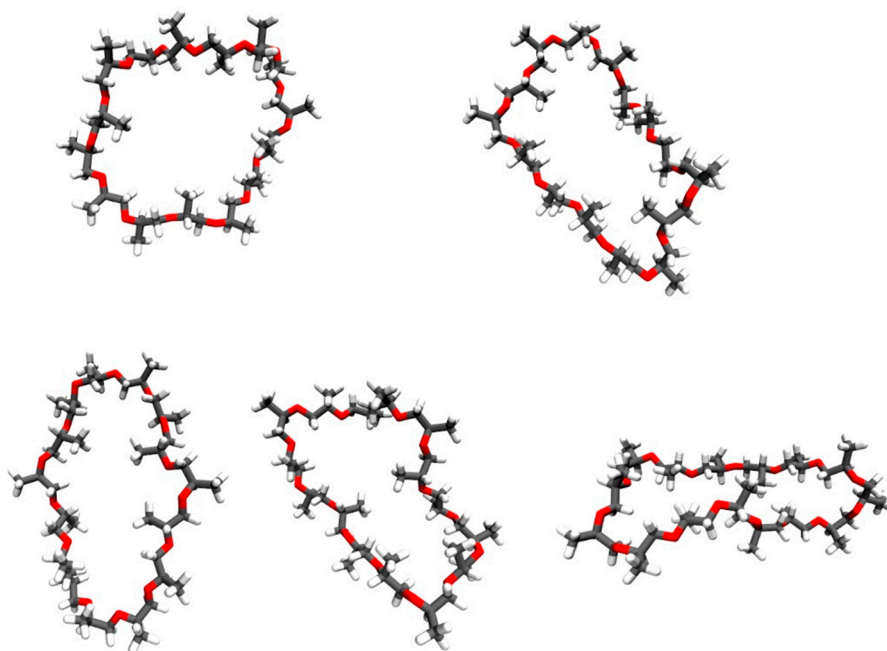

**Supplementary Figure S14.** Distribution of clusters found using TTClust, for compound 870 in NaCl solution.

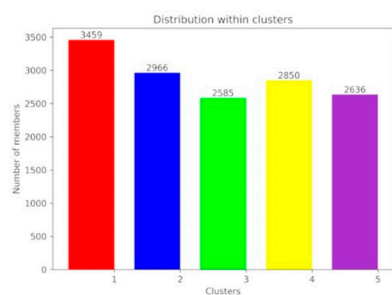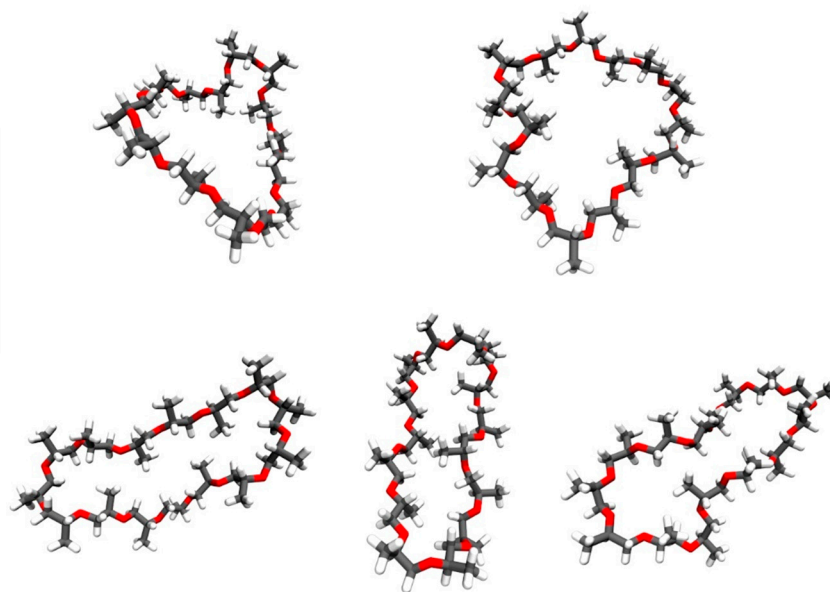

**Supplementary Figure S15.** Distribution of clusters found using TTClust, for compound 870 in KCl solution.

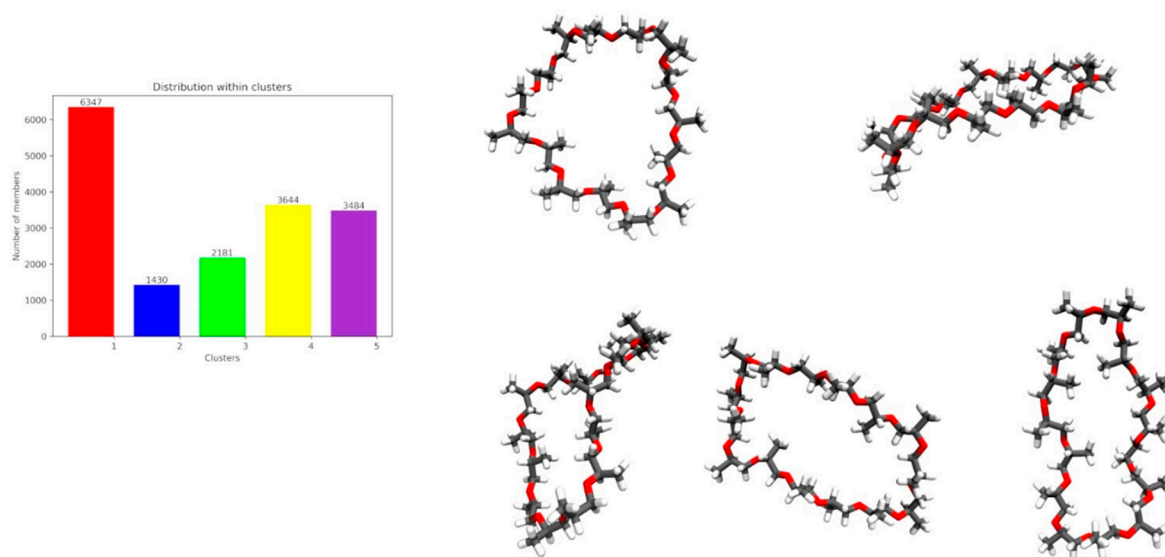

**Supplementary Figure S16.** Distribution of clusters found using TTClust, for compound 870 in NH<sub>4</sub>Cl solution.

**Supplementary Table S3.** Mean antiplasmodial activity and fractional IC<sub>50</sub>s of the cyclodepsipeptides and cyclic polypropylene glycols at each fixed-ratio and their corresponding sum of the fractional IC<sub>50</sub>, N = 2 biological repeats with 4 technical repeats. The positive controls chloroquine and artesunate were also included and their activities were within acceptable ranges.

| Ratio             | Fraction 6<br>(Cyclodepsipeptides)                                                   |                                                  | Fraction 13<br>(Cyclic Polypropylene Glycols)                                        |                                                  | Sum of Fractional IC <sub>50</sub> ( $\sum$ FIC <sub>50</sub> ) |
|-------------------|--------------------------------------------------------------------------------------|--------------------------------------------------|--------------------------------------------------------------------------------------|--------------------------------------------------|-----------------------------------------------------------------|
|                   | Antiplasmodial activity against <i>P. falciparum</i> , NF54 IC <sub>50</sub> (ng/mL) | Fractional IC <sub>50</sub> (FIC <sub>50</sub> ) | Antiplasmodial activity against <i>P. falciparum</i> , NF54 IC <sub>50</sub> (ng/mL) | Fractional IC <sub>50</sub> (FIC <sub>50</sub> ) |                                                                 |
| 5:0               | 23.4 ± 2.3                                                                           | 1.0                                              | N/A                                                                                  | N/A                                              | 1.0                                                             |
| 4:1               | 18.3 ± 0.4                                                                           | 0.78                                             | 104 ± 31.5                                                                           | 0.05                                             | 0.83                                                            |
| 3:2               | 13.9 ± 1.3                                                                           | 0.60                                             | 300 ± 7.8                                                                            | 0.16                                             | 0.76                                                            |
| 2:3               | 6.9 ± 0.7                                                                            | 0.30                                             | 271 ± 47.3                                                                           | 0.14                                             | 0.44                                                            |
| 1:4               | 8.2 ± 0.7                                                                            | 0.35                                             | 822 ± 69.3                                                                           | 0.43                                             | 0.78                                                            |
| 0:5               | N/A                                                                                  | N/A                                              | 1910 ± 42.3                                                                          | 1.0                                              | 1.0                                                             |
| Positive Controls |                                                                                      |                                                  |                                                                                      |                                                  |                                                                 |
| Chloroquine       |                                                                                      | 6.4 ± 0.5                                        |                                                                                      |                                                  |                                                                 |
| Artesunate        |                                                                                      | 1.8 ± 0.1                                        |                                                                                      |                                                  |                                                                 |

**Supplementary Table S4.** Mean antiplasmodial activity and fractional IC<sub>50</sub>s of valinomycin and cyclic polypropylene glycols (fraction #13) at each fixed-ratio and their corresponding sum of the fractional IC<sub>50</sub>, N=2 biological repeats with 4 technical repeats. The positive controls chloroquine and artesunate were also included and their activities were within acceptable ranges.

| Ratio             | Valinomycin                                                                          |                                                  | Fraction 13<br>(Cyclic Polypropylene Glycols)                                        |                                                  | Sum of Fractional IC <sub>50</sub> ( $\sum$ FIC <sub>50</sub> ) |
|-------------------|--------------------------------------------------------------------------------------|--------------------------------------------------|--------------------------------------------------------------------------------------|--------------------------------------------------|-----------------------------------------------------------------|
|                   | Antiplasmodial activity against <i>P. falciparum</i> , NF54 IC <sub>50</sub> (ng/mL) | Fractional IC <sub>50</sub> (FIC <sub>50</sub> ) | Antiplasmodial activity against <i>P. falciparum</i> , NF54 IC <sub>50</sub> (ng/mL) | Fractional IC <sub>50</sub> (FIC <sub>50</sub> ) |                                                                 |
| 5:0               | 3.75 ± 0.77                                                                          | 1.000                                            | N/A                                                                                  | N/A                                              | 1.000                                                           |
| 4:1               | 1.86 ± 0.05                                                                          | 0.496                                            | 128 ± 8.83                                                                           | 0.072                                            | 0.57                                                            |
| 3:2               | 0.90 ± 0.20                                                                          | 0.246                                            | 216 ± 43.5                                                                           | 0.121                                            | 0.37                                                            |
| 2:3               | 0.75 ± 0.08                                                                          | 0.199                                            | 407 ± 149                                                                            | 0.227                                            | 0.43                                                            |
| 1:4               | 0.53 ± 0.10                                                                          | 0.141                                            | 508.5 ± 77.0                                                                         | 0.376                                            | 0.51                                                            |
| 0:5               | N/A                                                                                  | N/A                                              | 1792 ± 547                                                                           | 1.000                                            | 1.000                                                           |
| Positive Controls |                                                                                      |                                                  |                                                                                      |                                                  |                                                                 |
| Chloroquine       | 5.4 ± 1.4                                                                            |                                                  |                                                                                      |                                                  |                                                                 |
| Artesunate        | 4.1 ± 1.3                                                                            |                                                  |                                                                                      |                                                  |                                                                 |
